# Supplementary material for: Variability of Urinary Creatinine in Healthy Individuals
Source: PubMed Central journal article supplement (PMC8003281; doi:10.3390/ijerph18063166), 2021-03-19
Supplement: ijerph-18-03166-s001.pdf [file ijerph-18-03166-s001.pdf]

**Supplementary Information:** Figures S1, S2 and S3. Tables S1, S2, S3, S4 and S5.

**Figure S1.** Association between specific gravity and creatinine concentration in 24-hour urine (N=60, first sampling day).

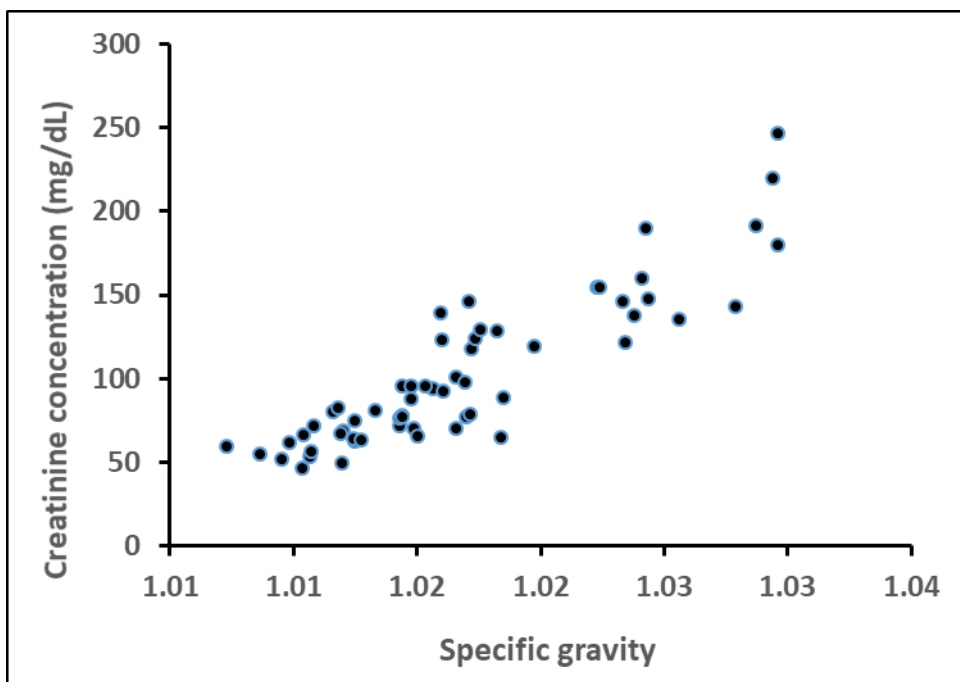

Figure S2. Median values of volume and flow rate (left axis) and specific gravity (right axis) for 31 women and 29 men in each of two 24-h periods.

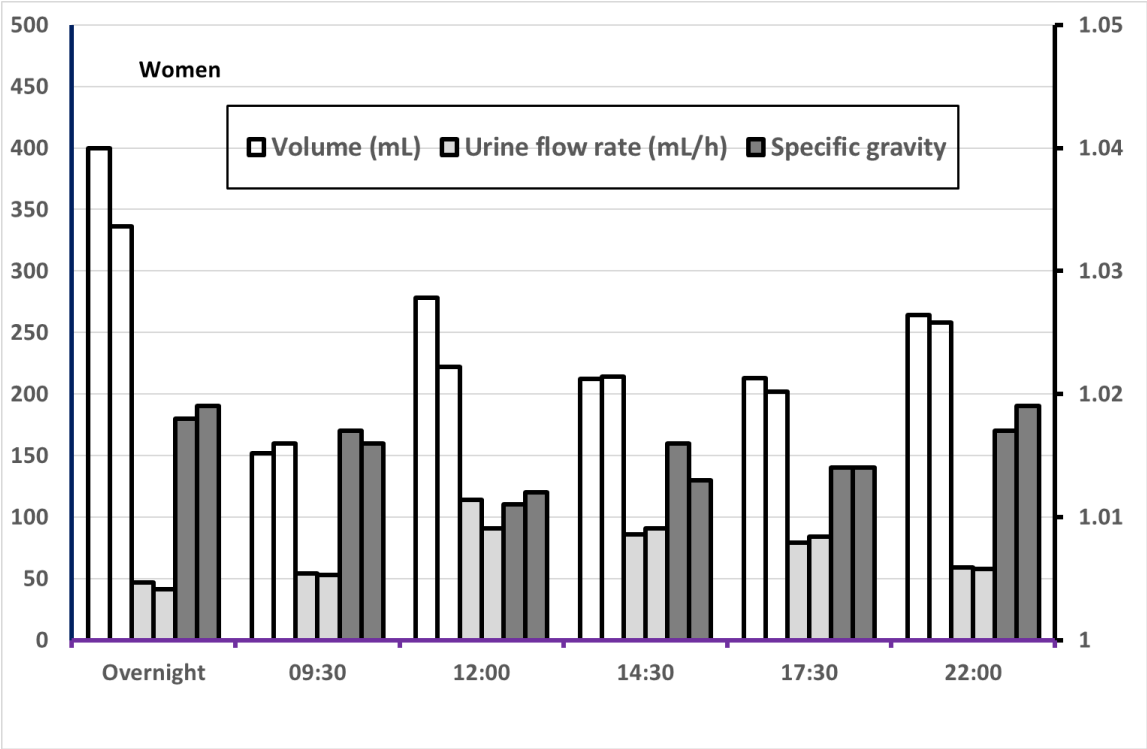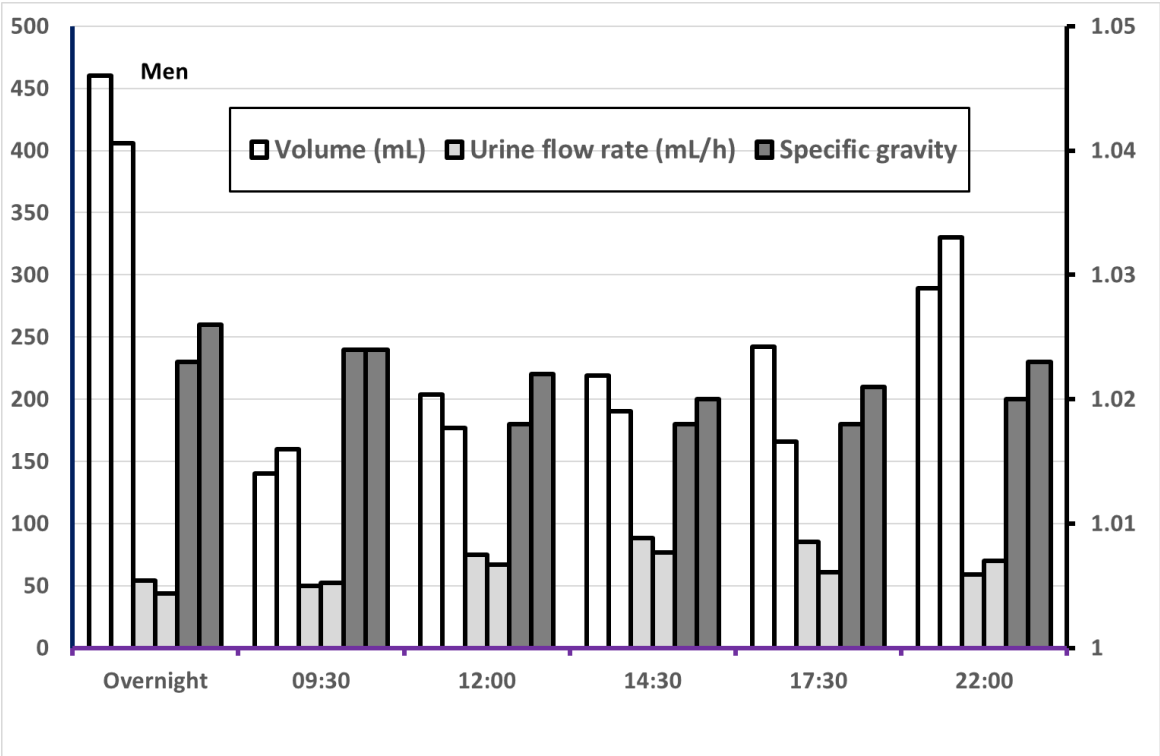

Figure S3. Median values of creatinine concentration (mg/dL), creatinine excretion rate (mg/h) and urine flow rate (ml/h) in 31 women and 29 men in each of two 24-h periods.

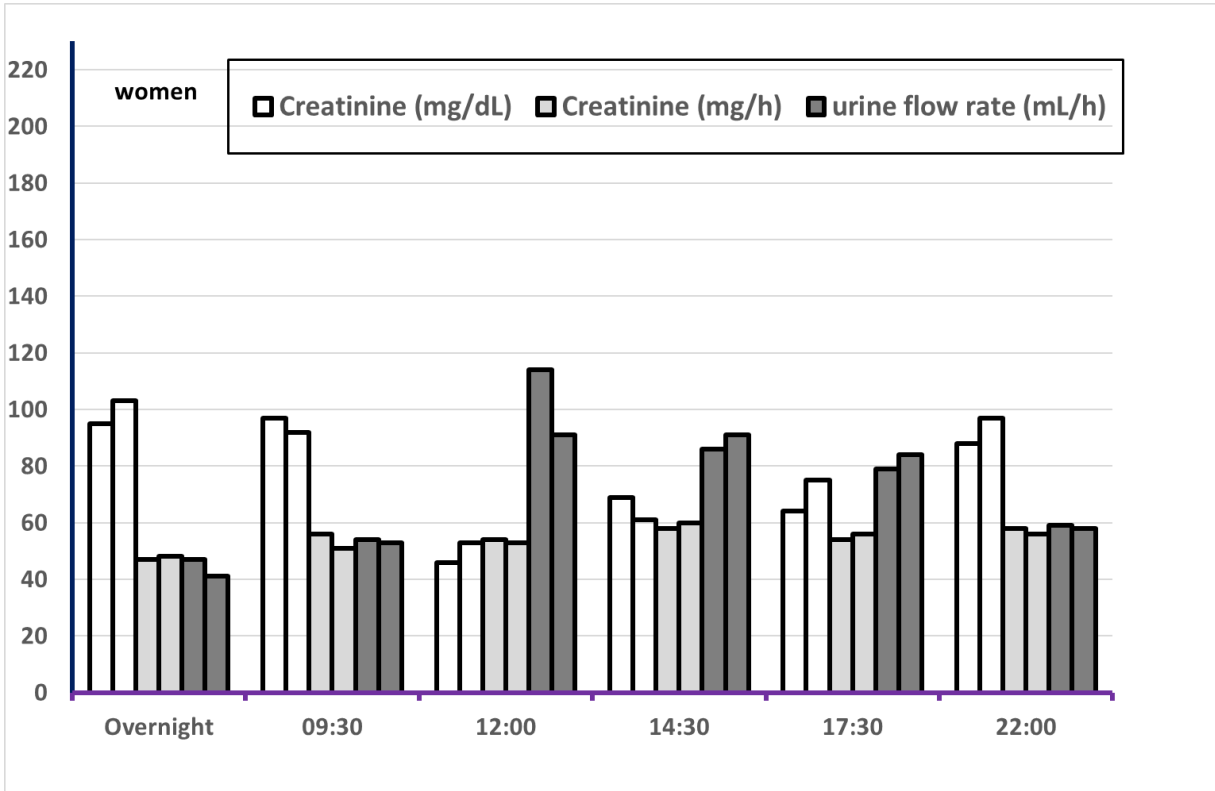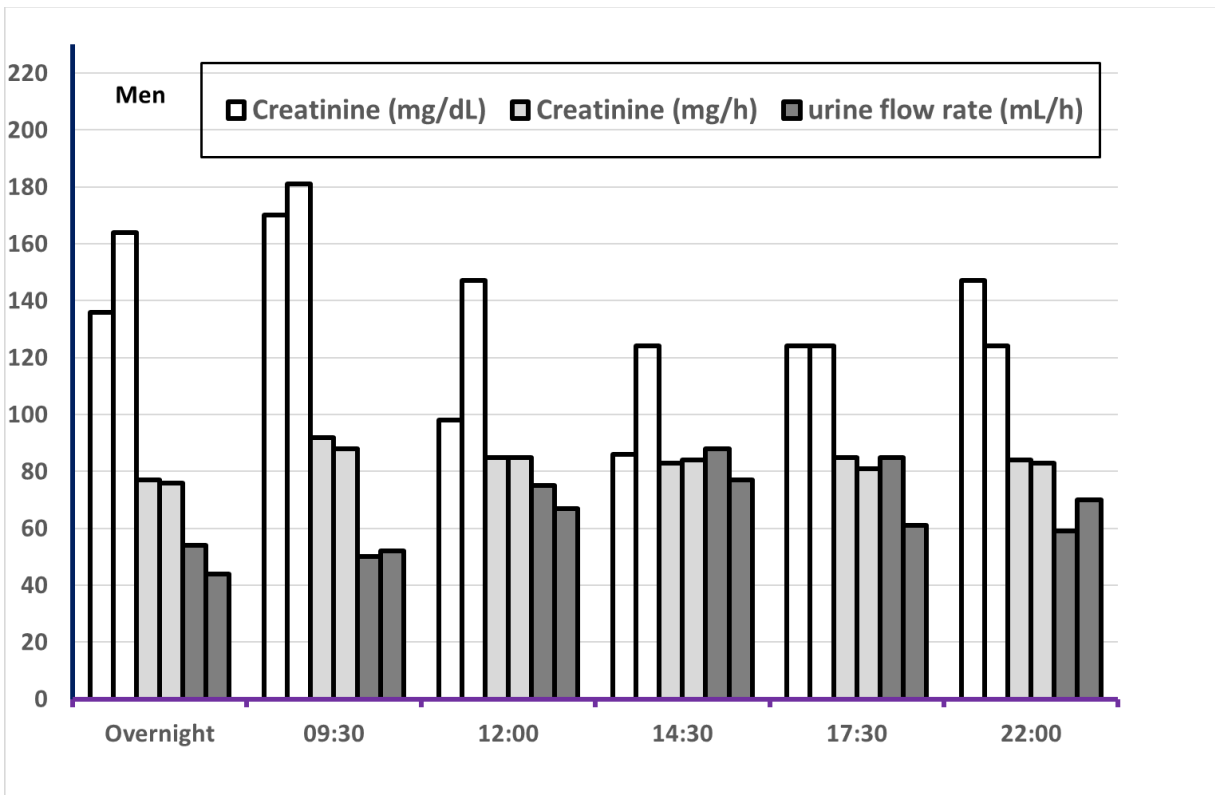

**Table S1. Blood samples: tubes, volume and numbers stored in the biobank.**

| Type of sampling tubes <sup>1</sup>        | Volume | Product         | Volume received/day, id | Storage tubes <sup>2</sup> | Type of pipettes used                        | Volume/PP tube     | N. Numbers stored in the biobank/day, id |
|--------------------------------------------|--------|-----------------|-------------------------|----------------------------|----------------------------------------------|--------------------|------------------------------------------|
| BD 368430<br>Serum tubes without additives | 10mL   | Serum           | ~ 4mL                   | 0.5mL PP                   | Acetone-washed<br>Pasteur<br>Pipettes (Glas) | 0.5mL serum        | 8                                        |
| VACUETTE 454056<br>Lithium Heparin         | 4mL    | Whole blood     | ~ 4mL                   | 2mL PP                     | Acid-washed<br>0.1-1mL<br>Plastic pipettes   | 1mL whole blood    | 1                                        |
|                                            |        |                 |                         | 0.5mL PP                   |                                              | 0.5mL whole blood  | 6                                        |
| BD 368886<br>Lithium Heparin               | 6mL    | Heparine plasma | ~ 3mL                   | 0.5mL PP                   | Acid-washed<br>0.1-1mL<br>Plastic pipettes   | 0.5mL plasma       | 5                                        |
|                                            |        | Erythrocytes    | ~ 3mL                   | 0.5mL PP                   | Acid-washed<br>0.1-1mL<br>Plastic pipettes   | 0.5mL erythrocytes | 5                                        |
| BD 367704<br>Coagulation Tube, 3,8%        | 4.5mL  | Citrate plasma  | ~ 2mL                   | 0.5mL PP                   | Untreated                                    | 0.5mL plasma       | 4                                        |

1) BD (Becton Dickinson, US), Vacuette (Greiner Bio-One North America, Inc). 2) PP= Polypropene tubes (Sarstedt, Nürmbrecht, Germany)

**Table S2. Number of diluted or concentrated urine samples /total numbers**

| times     | creatine <0.3 g/L | creatinine > 3 g/L | specific gravity < 1.01 | specific gravity >1.03 |
|-----------|-------------------|--------------------|-------------------------|------------------------|
| all       | 29/718            | 16/718             | 106/718                 | 54/718                 |
| 09:30     | 5/120             | 7/120              | 16/120                  | 17/120                 |
| 12:00     | 15/120            | 2/120              | 30/120                  | 5/120                  |
| 14:30     | 1/120             | 1/120              | 21/120                  | 4/120                  |
| 17:30     | 7/119             | 3/119              | 23/119                  | 7/119                  |
| 22:00     | 1/120             | 1/120              | 11/120                  | 10/120                 |
| overnight | 0/119             | 2/119              | 5/119                   | 11/119                 |

**Table S3. Urine data (volume, collection time, flow rate, creatinine concentration, creatinine excretion rate and specific gravity) in 60 subjects on two different days with six collection times each day.**

| Variable         | Time      | Day | N  | Mean (STD)  | Median | Range (min – max) |
|------------------|-----------|-----|----|-------------|--------|-------------------|
| Volume mL        | 9:30      | 1   | 60 | 171 (115)   | 144    | 21 – 505          |
|                  |           | 2   | 60 | 183 (127)   | 160    | 8 – 618           |
|                  | 12:00     | 1   | 60 | 277 (155)   | 254    | 53 – 888          |
|                  |           | 2   | 60 | 250 (162)   | 201    | 53 – 717          |
|                  | 14:30     | 1   | 60 | 236 (133)   | 213    | 52 – 685          |
|                  |           | 2   | 60 | 252 (167)   | 200    | 28 – 872          |
|                  | 17:30     | 1   | 59 | 277 (181)   | 238    | 50 – 958          |
|                  |           | 2   | 60 | 226 (139)   | 185    | 52 – 728          |
|                  | 22:00     | 1   | 60 | 305 (147)   | 271    | 103 – 770         |
|                  |           | 2   | 60 | 332 (217)   | 294    | 43 – 1027         |
|                  | Overnight | 1   | 60 | 445 (194)   | 429    | 85 – 1029         |
|                  |           | 2   | 59 | 408 (198)   | 352    | 70 – 1020         |
| Collection hours | 9:30      | 1   | 60 | 2.65 (0.76) | 2.63   | 0.75 – 5.50       |
|                  |           | 2   | 60 | 2.72 (0.90) | 2.63   | 1.42 – 7.42       |
|                  | 12:00     | 1   | 60 | 2.47 (0.36) | 2.50   | 1.25 – 3.50       |
|                  |           | 2   | 60 | 2.52 (0.35) | 2.50   | 1.63 – 3.50       |
|                  | 14:30     | 1   | 60 | 2.47(0.28)  | 2.50   | 1.67 – 3.17       |
|                  |           | 2   | 60 | 2.50 (0.29) | 2.50   | 2.00 – 3.25       |
|                  | 17:30     | 1   | 59 | 2.91 (0.48) | 2.98   | 0.83 – 4.08       |
|                  |           | 2   | 60 | 2.89 (0.53) | 3.00   | 0.67 – 4.00       |
|                  | 22:00     | 1   | 60 | 4.57 (0.58) | 4.50   | 3.50 – 7.00       |
|                  |           | 2   | 60 | 4.46 (0.61) | 4.50   | 2.42 – 6.92       |

|                           |           |   |    |              |       |             |
|---------------------------|-----------|---|----|--------------|-------|-------------|
|                           | Overnight | 1 | 60 | 8.83 (1.00)  | 8.88  | 6.17 – 11.0 |
|                           |           | 2 | 59 | 8.85 (0.91)  | 8.92  | 6.92 – 11.0 |
| Urinary flow rate<br>ml/h | 9:30      | 1 | 60 | 63.8 (40.8)  | 52.1  | 16.8 – 178  |
|                           |           | 2 | 60 | 69.4 (50.0)  | 52.6  | 5.1 – 242   |
|                           | 12:00     | 1 | 60 | 116.2 (69.1) | 101.8 | 20.5 – 300  |
|                           |           | 2 | 60 | 102.8 (70.6) | 74.6  | 18.3 – 308  |
|                           | 14:30     | 1 | 60 | 96.8 (59.4)  | 86.8  | 24.7 – 357  |
|                           |           | 2 | 60 | 101.3 (67.2) | 80.4  | 11.6 – 374  |
|                           | 17:30     | 1 | 59 | 199.0 (72.9) | 79.9  | 14.3 – 408  |
|                           |           | 2 | 60 | 81.7 (51.3)  | 61.8  | 15.2 – 224  |
|                           | 22:00     | 1 | 60 | 67.4 (34.2)  | 58.7  | 24.7 – 192  |
|                           |           | 2 | 60 | 75.1 (47.9)  | 64.9  | 9.6 – 228   |
|                           | Overnight | 1 | 60 | 51.1 (23.1)  | 48.7  | 9.3 – 120   |
|                           |           | 2 | 59 | 46.6 (22.6)  | 41.8  | 6.95 – 116  |
| Creatinine g/L            | 9:30      | 1 | 60 | 1.51 (1.02)  | 1.30  | 0.23 – 5.88 |
|                           |           | 2 | 60 | 1.46 (1.00)  | 1.36  | 0.10 – 5.88 |
|                           | 12:00     | 1 | 60 | 0.88 (0.73)  | 0.66  | 0.16 – 4.07 |
|                           |           | 2 | 60 | 1.03 (0.71)  | 0.87  | 0.18 – 3.28 |
|                           | 14:30     | 1 | 60 | 1.02 (0.68)  | 0.83  | 0.31 – 3.62 |
|                           |           | 2 | 60 | 0.98 (0.52)  | 0.84  | 0.26 – 2.38 |
|                           | 17:30     | 1 | 59 | 1.04 (0.65)  | 0.90  | 0.24 – 3.05 |
|                           |           | 2 | 60 | 1.18 (0.70)  | 1.13  | 0.23 – 3.51 |
|                           | 22:00     | 1 | 60 | 1.21 (0.57)  | 1.06  | 0.33 – 2.38 |
|                           |           | 2 | 60 | 1.20 (0.71)  | 1.02  | 0.29 – 3.28 |
|                           | Overnight | 1 | 60 | 1.37 (0.67)  | 1.24  | 0.38 – 3.05 |
|                           |           | 2 | 59 | 1.48 (0.73)  | 1.47  | 0.37 – 4.41 |

|                |           |   |    |               |       |               |
|----------------|-----------|---|----|---------------|-------|---------------|
| Creatinine g/h | 9:30      | 1 | 60 | 0.071 (0.030) | 0.066 | 0.014 – 0.190 |
|                |           | 2 | 60 | 0.071 (0.038) | 0.066 | 0.013 – 0.224 |
|                | 12:00     | 1 | 60 | 0.070 (0.026) | 0.063 | 0.022 – 0.171 |
|                |           | 2 | 60 | 0.073 (0.040) | 0.064 | 0.017 – 0.258 |
|                | 14:30     | 1 | 60 | 0.074 (0.028) | 0.069 | 0.023 – 0.169 |
|                |           | 2 | 60 | 0.082 (0.059) | 0.067 | 0.012 – 0.465 |
|                | 17:30     | 1 | 59 | 0.074 (0.035) | 0.067 | 0.021 – 0.221 |
|                |           | 2 | 60 | 0.071 (0.033) | 0.060 | 0.026 – 0.246 |
|                | 22:00     | 1 | 60 | 0.071 (0.027) | 0.068 | 0.011 – 0.175 |
|                |           | 2 | 60 | 0.069 (0.033) | 0.064 | 0.022 – 0.224 |
|                | Overnight | 1 | 60 | 0.060 (0.024) | 0.058 | 0.021 – 0.144 |
|                |           | 2 | 59 | 0.058 (0.022) | 0.054 | 0.013 – 0.112 |
| SG             | 9:30      | 1 | 60 | 1.021 (0.008) | 1.022 | 1.006 – 1.040 |
|                |           | 2 | 60 | 1.020 (0.009) | 1.021 | 1.004 – 1.042 |
|                | 12:00     | 1 | 60 | 1.015 (0.008) | 1.013 | 1.004 – 1.040 |
|                |           | 2 | 60 | 1.017 (0.008) | 1.018 | 1.004 – 1.031 |
|                | 14:30     | 1 | 60 | 1.017 (0.008) | 1.017 | 1.005 – 1.040 |
|                |           | 2 | 60 | 1.017 (0.007) | 1.018 | 1.006 – 1.034 |
|                | 17:30     | 1 | 59 | 1.017 (0.008) | 1.016 | 1.006 – 1.033 |
|                |           | 2 | 60 | 1.018 (0.008) | 1.018 | 1.006 – 1.035 |
|                | 22:00     | 1 | 60 | 1.020 (0.007) | 1.019 | 1.008 – 1.035 |
|                |           | 2 | 60 | 1.019 (0.008) | 1.020 | 1.006 – 1.034 |
|                | Overnight | 1 | 60 | 1.020 (0.007) | 1.020 | 1.006 – 1.034 |
|                |           | 2 | 59 | 1.021 (0.008) | 1.022 | 1.008 – 1.039 |



**Table S4. Urine data (volume, collection time, flow rate, creatinine concentration, creatinine excretion rate and specific gravity) in 31 women on two different days with six collection times each day.**

| Variable         | Time      | Day | N  | Mean (STD)  | Median | Range (min – max) |
|------------------|-----------|-----|----|-------------|--------|-------------------|
| Volume mL        | 9:30      | 1   | 31 | 191 (127)   | 152    | 43 – 505          |
|                  |           | 2   | 31 | 194 (232)   | 160    | 8 – 618           |
|                  | 12:00     | 1   | 31 | 292 (123)   | 278    | 92 – 612          |
|                  |           | 2   | 31 | 260 (152)   | 222    | 53 – 572          |
|                  | 14:30     | 1   | 31 | 229 (115)   | 212    | 52 – 527          |
|                  |           | 2   | 31 | 249 (130)   | 214    | 28 – 535          |
|                  | 17:30     | 1   | 30 | 277 (181)   | 213    | 50 – 768          |
|                  |           | 2   | 31 | 243 (153)   | 202    | 52 – 728          |
|                  | 22:00     | 1   | 31 | 308 (136)   | 264    | 103 – 623         |
|                  |           | 2   | 31 | 282 (147)   | 258    | 80 – 597          |
|                  | Overnight | 1   | 31 | 452 (232)   | 400    | 85 – 1029         |
|                  |           | 2   | 31 | 391 (213)   | 336    | 70 – 1020         |
| Collection hours | 9:30      | 1   | 31 | 2.86 (0.70) | 2.83   | 0.75 – 5.50       |
|                  |           | 2   | 31 | 2.77 (0.65) | 2.83   | 1.58 – 4.00       |
|                  | 12:00     | 1   | 31 | 2.43 (0.46) | 2.48   | 1.25 – 3.50       |
|                  |           | 2   | 31 | 2.54 (0.36) | 2.50   | 1.63 – 3.50       |
|                  | 14:30     | 1   | 31 | 2.55 (0.29) | 2.50   | 1.92 – 3.17       |
|                  |           | 2   | 31 | 2.51 (0.26) | 2.50   | 2.00 – 3.08       |
|                  | 17:30     | 1   | 30 | 2.85 (0.44) | 2.83   | 2.00 – 4.08       |
|                  |           | 2   | 31 | 2.88 (0.50) | 3.00   | 1.33 – 3.58       |
|                  | 22:00     | 1   | 31 | 4.62 (0.58) | 4.53   | 3.50 – 6.75       |
|                  |           | 2   | 31 | 4.37 (0.60) | 4.50   | 2.42 – 6.07       |

|                           |           |   |    |              |       |             |
|---------------------------|-----------|---|----|--------------|-------|-------------|
|                           | Overnight | 1 | 31 | 8.90 (0.95)  | 9.00  | 7.00 – 11.0 |
|                           |           | 2 | 31 | 8.92 (0.84)  | 8.92  | 7.00 – 11.0 |
| Urinary flow rate<br>ml/h | 9:30      | 1 | 31 | 68.3 (46.7)  | 53.8  | 17.2 – 178  |
|                           |           | 2 | 31 | 69.7 (51.2)  | 53.0  | 5.05 – 204  |
|                           | 12:00     | 1 | 31 | 128.4 (70.2) | 113.6 | 36.8 – 300  |
|                           |           | 2 | 31 | 107.3 (69.7) | 91.0  | 18.3 – 308  |
|                           | 14:30     | 1 | 31 | 89.5 (43.5)  | 85.6  | 26.0 – 192  |
|                           |           | 2 | 31 | 99.8 (52.8)  | 91.4  | 11.6 – 238  |
|                           | 17:30     | 1 | 30 | 97.5 (64.0)  | 79.1  | 22.1 – 271  |
|                           |           | 2 | 31 | 87.9 (55.2)  | 83.9  | 15.2 – 224  |
|                           | 22:00     | 1 | 31 | 67.3 (30.6)  | 58.7  | 24.7 – 159  |
|                           |           | 2 | 31 | 64.6 (30.9)  | 58.1  | 17.8 – 133  |
|                           | Overnight | 1 | 31 | 51.8 (27.9)  | 46.8  | 9.3 – 120   |
|                           |           | 2 | 31 | 44.5 (23.9)  | 41.4  | 6.95 – 104  |
| Creatinine g/L            | 9:30      | 1 | 31 | 1.10 (0.66)  | 0.97  | 0.23 – 2.38 |
|                           |           | 2 | 31 | 1.21 (1.16)  | 0.92  | 0.10 – 5.88 |
|                           | 12:00     | 1 | 31 | 0.58 (0.36)  | 0.46  | 0.20 – 1.47 |
|                           |           | 2 | 31 | 0.82 (0.67)  | 0.53  | 0.18 – 3.28 |
|                           | 14:30     | 1 | 31 | 0.86 (0.49)  | 0.69  | 0.31 – 2.49 |
|                           |           | 2 | 31 | 0.74 (0.36)  | 0.61  | 0.26 – 1.81 |
|                           | 17:30     | 1 | 30 | 0.84 (0.58)  | 0.64  | 0.24 – 2.26 |
|                           |           | 2 | 31 | 0.91 (0.53)  | 0.75  | 0.23 – 2.15 |
|                           | 22:00     | 1 | 31 | 0.97 (0.49)  | 0.88  | 0.33 – 2.15 |
|                           |           | 2 | 31 | 1.07 (0.61)  | 0.97  | 0.36 – 2.60 |
|                           | Overnight | 1 | 31 | 1.12 (0.59)  | 0.95  | 0.38 – 2.71 |
|                           |           | 2 | 31 | 1.34 (0.88)  | 1.03  | 0.37 – 4.41 |

|                |           |   |    |               |       |               |
|----------------|-----------|---|----|---------------|-------|---------------|
| Creatinine g/h | 9:30      | 1 | 31 | 0.053 (0.020) | 0.056 | 0.014 – 0.112 |
|                |           | 2 | 31 | 0.049 (0.018) | 0.051 | 0.013 – 0.078 |
|                | 12:00     | 1 | 31 | 0.056 (0.013) | 0.054 | 0.022 – 0.087 |
|                |           | 2 | 31 | 0.060 (0.032) | 0.053 | 0.017 – 0.196 |
|                | 14:30     | 1 | 31 | 0.062 (0.016) | 0.058 | 0.031 – 0.114 |
|                |           | 2 | 31 | 0.060 (0.019) | 0.060 | 0.012 – 0.128 |
|                | 17:30     | 1 | 30 | 0.057 (0.018) | 0.054 | 0.021 – 0.109 |
|                |           | 2 | 31 | 0.057 (0.015) | 0.056 | 0.026 – 0.114 |
|                | 22:00     | 1 | 31 | 0.056 (0.017) | 0.058 | 0.011 – 0.100 |
|                |           | 2 | 31 | 0.055 (0.016) | 0.056 | 0.022 – 0.095 |
|                | Overnight | 1 | 31 | 0.047 (0.014) | 0.047 | 0.021 – 0.079 |
|                |           | 2 | 31 | 0.044 (0.014) | 0.048 | 0.013 – 0.067 |
| SG             | 9:30      | 1 | 31 | 1.018 (0.008) | 1.017 | 1.006 – 1.031 |
|                |           | 2 | 31 | 1.018 (0.010) | 1.016 | 1.004 – 1.042 |
|                | 12:00     | 1 | 31 | 1.012 (0.005) | 1.011 | 1.004 – 1.024 |
|                |           | 2 | 31 | 1.015 (0.008) | 1.012 | 1.005 – 1.030 |
|                | 14:30     | 1 | 31 | 1.016 (0.006) | 1.016 | 1.005 – 1.028 |
|                |           | 2 | 31 | 1.015 (0.006) | 1.013 | 1.007 – 1.028 |
|                | 17:30     | 1 | 30 | 1.015 (0.007) | 1.014 | 1.006 – 1.032 |
|                |           | 2 | 31 | 1.015 (0.007) | 1.014 | 1.006 – 1.031 |
|                | 22:00     | 1 | 31 | 1.019 (0.007) | 1.017 | 1.008 – 1.035 |
|                |           | 2 | 31 | 1.018(0.007)  | 1.019 | 1.007 – 1.030 |
|                | Overnight | 1 | 31 | 1.018 (0.007) | 1.018 | 1.006 – 1.032 |
|                |           | 2 | 31 | 1.019 (0.008) | 1.016 | 1.008 – 1.034 |

**Table S5. Urine data (volume, collection time, flow rate, creatinine concentration, creatinine excretion rate and specific gravity) in 29 men on two different days with six collection times each day.**

| Variable         | Time      | Day | N  | Mean (STD)  | Median | Range (min – max) |
|------------------|-----------|-----|----|-------------|--------|-------------------|
| Volume mL        | 9:30      | 1   | 29 | 150 (99.7)  | 140    | 21 – 400          |
|                  |           | 2   | 29 | 170 (109)   | 160    | 64 – 565          |
|                  | 12:00     | 1   | 29 | 261 (184)   | 204    | 53 – 888          |
|                  |           | 2   | 29 | 239 (173)   | 177    | 68 – 717          |
|                  | 14:30     | 1   | 29 | 243 (151)   | 219    | 60 – 685          |
|                  |           | 2   | 29 | 256 (202)   | 190    | 70 – 872          |
|                  | 17:30     | 1   | 29 | 277 (185)   | 242    | 50 – 958          |
|                  |           | 2   | 29 | 208 (123)   | 166    | 53 – 483          |
|                  | 22:00     | 1   | 29 | 302 (159)   | 289    | 113 – 770         |
|                  |           | 2   | 29 | 384 (265)   | 330    | 43 – 1027         |
|                  | Overnight | 1   | 29 | 437 (147)   | 460    | 167 – 692         |
|                  |           | 2   | 28 | 428 (183)   | 406    | 157 – 913         |
| Collection hours | 9:30      | 1   | 29 | 2.44 (0.77) | 2.50   | 0.75 – 4.08       |
|                  |           | 2   | 29 | 2.67 (1.11) | 2.33   | 1.42 – 7.42       |
|                  | 12:00     | 1   | 29 | 2.51 (0.22) | 2.50   | 2.08 – 3.17       |
|                  |           | 2   | 29 | 2.50 (0.34) | 2.47   | 1.97 – 3.42       |
|                  | 14:30     | 1   | 29 | 2.39 (0.24) | 2.50   | 1.67 – 2.67       |
|                  |           | 2   | 29 | 2.48 (0.33) | 2.50   | 2.00 – 3.25       |
|                  | 17:30     | 1   | 29 | 2.98 (0.51) | 3.08   | 0.83 – 3.50       |
|                  |           | 2   | 29 | 2.90 (0.58) | 3.00   | 0.66 – 4.00       |
|                  | 22:00     | 1   | 29 | 4.54 (0.59) | 4.50   | 3.92 – 7.00       |
|                  |           | 2   | 29 | 4.54 (0.62) | 4.50   | 2.67 – 6.92       |

|                           |           |   |    |              |      |              |
|---------------------------|-----------|---|----|--------------|------|--------------|
|                           | Overnight | 1 | 29 | 8.77 (1.07)  | 8.83 | 6.17 – 10.75 |
|                           |           | 2 | 28 | 8.77 (0.99)  | 8.80 | 6.92 – 11.0  |
| Urinary flow rate<br>ml/h | 9:30      | 1 | 29 | 59.1 (33.5)  | 50.3 | 16.8 – 155   |
|                           |           | 2 | 29 | 69.1 (49.5)  | 52.2 | 23.6 – 242   |
|                           | 12:00     | 1 | 29 | 103.3 (66.9) | 75.2 | 20.5 – 290   |
|                           |           | 2 | 29 | 98.1 (72.5)  | 67.3 | 27.4 – 297   |
|                           | 14:30     | 1 | 29 | 104.5 (72.7) | 88.0 | 24.7 – 357   |
|                           |           | 2 | 29 | 102.9 (80.7) | 76.8 | 29.0 – 373   |
|                           | 17:30     | 1 | 29 | 100.5 (82.2) | 85.4 | 14.2 – 408   |
|                           |           | 2 | 29 | 75.1 (47.0)  | 61.3 | 24.3 – 198   |
|                           | 22:00     | 1 | 29 | 67.6 (38.3)  | 58.8 | 28.9 – 192   |
|                           |           | 2 | 29 | 86.3 (59.6)  | 69.7 | 9.56 – 228   |
|                           | Overnight | 1 | 29 | 50.3 (16.9)  | 53.8 | 18.9 – 81.4  |
|                           |           | 2 | 28 | 49.0 (21.1)  | 44.0 | 17.1 – 116   |
| Creatinine g/L            | 9:30      | 1 | 29 | 1.94 (1.16)  | 1.70 | 0.54 – 5.88  |
|                           |           | 2 | 29 | 1.71 (0.74)  | 1.81 | 0.55 – 3.73  |
|                           | 12:00     | 1 | 29 | 1.20 (0.89)  | 0.98 | 0.16 – 4.07  |
|                           |           | 2 | 29 | 1.26 (0.69)  | 1.47 | 0.28 – 2.49  |
|                           | 14:30     | 1 | 29 | 1.19 (0.82)  | 0.86 | 0.31 – 3.62  |
|                           |           | 2 | 29 | 1.23 (0.54)  | 1.24 | 0.32 – 2.38  |
|                           | 17:30     | 1 | 29 | 1.25 (0.66)  | 1.24 | 0.34 – 3.05  |
|                           |           | 2 | 29 | 1.46 (0.77)  | 1.24 | 0.29 – 3.51  |
|                           | 22:00     | 1 | 29 | 1.46 (0.54)  | 1.47 | 0.46 – 2.38  |
|                           |           | 2 | 29 | 1.34 (0.78)  | 1.24 | 0.29 – 3.28  |
|                           | Overnight | 1 | 29 | 1.64 (0.67)  | 1.36 | 0.55 – 3.05  |
|                           |           | 2 | 29 | 1.63 (0.51)  | 1.64 | 0.86 – 2.49  |

|                |           |   |    |               |       |               |
|----------------|-----------|---|----|---------------|-------|---------------|
| Creatinine g/h | 9:30      | 1 | 29 | 0.090 (0.030) | 0.092 | 0.036 – 0.190 |
|                |           | 2 | 29 | 0.096 (0.039) | 0.088 | 0.054 – 0.224 |
|                | 12:00     | 1 | 29 | 0.085 (0.029) | 0.085 | 0.027 – 0.171 |
|                |           | 2 | 29 | 0.088 (0.042) | 0.085 | 0.035 – 0.258 |
|                | 14:30     | 1 | 29 | 0.087 (0.031) | 0.083 | 0.023 – 0.169 |
|                |           | 2 | 29 | 0.106 (0.077) | 0.084 | 0.030 – 0.465 |
|                | 17:30     | 1 | 29 | 0.091 (0.039) | 0.085 | 0.027 – 0.222 |
|                |           | 2 | 29 | 0.087 (0.041) | 0.081 | 0.036 – 0.246 |
|                | 22:00     | 1 | 29 | 0.086 (0.028) | 0.084 | 0.032 – 0.175 |
|                |           | 2 | 29 | 0.084 (0.040) | 0.083 | 0.027 – 0.224 |
|                | Overnight | 1 | 29 | 0.075 (0.023) | 0.077 | 0.034 – 0.144 |
|                |           | 2 | 28 | 0.073 (0.019) | 0.076 | 0.033 – 0.112 |
| SG             | 9:30      | 1 | 29 | 1.024 (0.007) | 1.024 | 1.009 – 1.400 |
|                |           | 2 | 29 | 1.023 (0.008) | 1.024 | 1.008 – 1.038 |
|                | 12:00     | 1 | 29 | 1.018 (0.010) | 1.018 | 1.004 – 1.040 |
|                |           | 2 | 29 | 1.019 (0.009) | 1.022 | 1.004 – 1.031 |
|                | 14:30     | 1 | 29 | 1.019 (0.009) | 1.018 | 1.005 – 1.040 |
|                |           | 2 | 29 | 1.020 (0.007) | 1.020 | 1.006 – 1.034 |
|                | 17:30     | 1 | 29 | 1.019 (0.008) | 1.018 | 1.006 – 1.033 |
|                |           | 2 | 29 | 1.021 (0.008) | 1.021 | 1.006 – 1.035 |
|                | 22:00     | 1 | 29 | 1.021 (0.007) | 1.020 | 1.008 – 1.033 |
|                |           | 2 | 29 | 1.020 (0.009) | 1.023 | 1.006 – 1.034 |
|                | Overnight | 1 | 29 | 1.022 (0.007) | 1.023 | 1.007 – 1.034 |
|                |           | 2 | 28 | 1.024 (0.007) | 1.026 | 1.012 – 1.039 |
